# Supplementary material for: Non-Athletic Cohorts Enrolled in Longitudinal Whole-Body Electromyostimulation Trials—An Evidence Map
Source: MDPI journal article supplement (doi:10.3390/s24030972), 2024-02-02
Supplement: s1 [file s1]

## Supplement

**Table S1: Search strategies and their results**

| Database         | Search date                | Search terms                                                                                                                                                                                                                                                                                                                                                                                                                                                                                                                                                                                                            | Number of hits |
|------------------|----------------------------|-------------------------------------------------------------------------------------------------------------------------------------------------------------------------------------------------------------------------------------------------------------------------------------------------------------------------------------------------------------------------------------------------------------------------------------------------------------------------------------------------------------------------------------------------------------------------------------------------------------------------|----------------|
| Medline (PubMed) | 6 <sup>th</sup> March 2023 | (WB-EMS[TIAB] OR "whole-body electromyostimulation"[TIAB] OR "whole body electromyostimulation"[TIAB] OR "whole-body electrostimulation"[TIAB] OR "whole body electrostimulation"[TIAB] OR electromyostimulation[TIAB] OR "EMS training"[TIAB] OR "EMS intervention"[TIAB] OR "EMS suit*" [TIAB] OR "EMS belt*" [TIAB] OR "B-SES"[TIAB] OR "belt electrode"[TIAB])                                                                                                                                                                                                                                                      | 421            |
| CENTRAL          | 6 <sup>th</sup> March 2023 | (WB-EMS OR "whole-body electromyostimulation" OR "whole body electromyostimulation" OR "whole-body electrostimulation" OR "whole body electrostimulation" OR electromyostimulation OR "EMS training" OR "EMS intervention" OR "EMS suit*" OR "EMS belt*" OR "B-SES" OR "belt electrode"); ti,ab,kw                                                                                                                                                                                                                                                                                                                      | 248            |
| CINAHL           | 6 <sup>th</sup> March 2023 | 1. TI (WB-EMS OR "whole-body electromyostimulation" OR "whole body electromyostimulation" OR "whole-body electrostimulation" OR "whole body) electrostimulation" OR electromyostimulation OR "EMS training" OR "EMS intervention" OR "EMS suit*" OR "EMS belt*" OR "B-SES" OR "belt electrode"<br><br>2. AB (WB-EMS OR "whole-body electromyostimulation" OR "whole body electromyostimulation" OR "whole-body electrostimulation" OR "whole body) electrostimulation" OR electromyostimulation OR "EMS training" OR "EMS intervention" OR "EMS suit*" OR "EMS belt*" OR "B-SES" OR "belt electrode"<br><br>3. S1 OR S2 | 104            |
| SPORTDiscus      | 6 <sup>th</sup> March 2023 | 1. TI (WB-EMS OR "whole-body electromyostimulation" OR "whole body electromyostimulation" OR "whole-body electrostimulation" OR "whole body) electrostimulation" OR electromyostimulation OR "EMS training" OR "EMS intervention" OR "EMS suit*" OR "EMS belt*" OR "B-SES" OR "belt electrode"<br><br>2. AB (WB-EMS OR "whole-body electromyostimulation" OR "whole body electromyostimulation" OR "whole-body electrostimulation" OR "whole body) electrostimulation" OR electromyostimulation OR "EMS training" OR "EMS intervention" OR "EMS suit*" OR "EMS belt*" OR "B-SES" OR "belt electrode"<br><br>3. S1 OR S2 | 185            |
| PEDro            | 6 <sup>th</sup> March 2023 | Abstract & Title: "whole-body electromyostimulation"<br><br>Method: clinical trial                                                                                                                                                                                                                                                                                                                                                                                                                                                                                                                                      | 34             |

|                    |                            |                                                                                                                                                                                                                                                   |      |
|--------------------|----------------------------|---------------------------------------------------------------------------------------------------------------------------------------------------------------------------------------------------------------------------------------------------|------|
| Clinicaltrials.gov | 6 <sup>th</sup> March 2023 | other terms: WB-EMS OR "whole-body electromyostimulation" OR "whole body electromyostimulation" OR "whole-body electrostimulation" OR "whole body electrostimulation" OR electromyostimulation OR "EMS suit*" OR "EMS belt*" OR "belt electrode*" | 39   |
| ICTRP              | 6 <sup>th</sup> March 2023 | Search: WB-EMS OR "whole-body electromyostimulation" OR "whole body electromyostimulation" OR "whole-body electrostimulation" OR "whole body electrostimulation" OR electromyostimulation OR "EMS suit*" OR "EMS belt*" OR "belt electrode*"      | 72   |
| Google Scholar     | 6 <sup>th</sup> March 2023 | Advanced search: "whole body electromyostimulation" OR "WB EMS" OR "EMS suit" OR "belt electrode" with at least one of the words, anywhere in the article                                                                                         | 1293 |

**Table S2 Exercise and stimulation characteristics of the included studies.**

|    | Author                  | EMS-System | Isolated EMS ? | Active mode ? | Intervention length (months) | Sessions /week (n) | Session length (min) | Impulse frequency (Hz) | Impulse width (µs) | Impulse length (s) | Impulse break (s) |
|----|-------------------------|------------|----------------|---------------|------------------------------|--------------------|----------------------|------------------------|--------------------|--------------------|-------------------|
| 1  | Afsharnezhad et al.[17] | WB-EMS     | yes            | yes           | 2                            | 3                  | 90                   | 30 to 85               | n.g.               | 6                  | 6                 |
| 2  | Akcay et al.[18]        | WB-EMS     | yes            | yes           | 1                            | 2                  | 20                   | 85,                    | 350                | 30                 | 10                |
| 3  | Almada et al.[19]       | WB-EMS     | no             | yes           | 1                            | 2                  | 20                   | n.g.                   | n.g.               | n.g.               | n.g.              |
| 4  | Amaro-Gahete et al.[21] | WB-EMS     | no             | yes           | 1.5                          | 1                  | 12 - 20              | 12 to 90               | 350                | 4 - 30             | 4 - 30            |
| 5  | Amaro-Gahete et al.[20] | WB-EMS     | no             | yes           | 3                            | 2                  | 20 or 32,5           | 15-20 and 35-75        | 200 - 400          | 6                  | 4                 |
| 6  | Andre et al.[22]        | WB-EMS     | yes            | yes           | 1.5                          | 5                  | 25                   | 30 and 85              | 350                | 6                  | 4                 |
| 7  | Bellia et al.[23]       | WB-EMS     | yes            | yes           | 6                            | 2                  | 20                   | 15 or 85               | 400                | 4 <sup>2</sup>     | 4                 |
| 8  | Berger et al.[24]       | WB-EMS     | yes            | yes           | 2.5                          | 1.50               | 20                   | 20 or 85               | 350                | 4                  | 4                 |
| 9  | Blöckl et al.[25]       | WB-EMS     | yes            | yes           | 2                            | 1-1.5              | 20                   | 85                     | 350                | 6                  | 4                 |
| 10 | Bostan et al.[26]       | WB-EMS     | yes            | yes           | 1                            | 2                  | 25                   | 85                     | 350                | 4                  | 4                 |
| 11 | Bouty-Regard et al.[27] | B-SES      | yes            | n.g.          | 3                            | 2                  | 20                   | 20                     | 250                | 5                  | 2                 |
| 12 | Cetin et al.[28]        | WB-EMS     | yes            | Yes           | 2                            | 2                  | 25                   | 85                     | 350                | 4                  | 4                 |
| 13 | DiCagno et al.[29]      | WB-EMS     | yes            | yes           | 3                            | 2                  | 20                   | 7 or 85                | 350                | 4                  | 4                 |
| 14 | Dyaksa et al.[30]       | WB-EMS     | yes            | yes           | 1.5                          | 2                  | 25                   | n.g.                   | n.g.               | n.g.               | n.g.              |
| 15 | Ethem et al.[31]        | WB-EMS     | yes            | yes           | 1.5                          | 2                  | 25                   | 7 and 85               | 350                | variable           | variable          |
| 16 | Evangelista et al.[33]  | WB-EMS     | no             | yes           | 2                            | 2                  | 20                   | 85                     | 350                | 1200               | 0                 |
| 17 | Evangelista et al.[32]  | WB-EMS     | no             | yes           | 1.5                          | 2                  | 20                   | 85                     | 350                | 4                  | 2                 |
| 18 | Fritzsche et al.[34]    | WB-EMS     | yes            | yes           | 6                            | 2                  | 20                   | 80                     | 300                | 4                  | 4                 |
| 19 | Ghannadi et al.[35]     | WB-EMS     | no             | yes           | 1.5                          | 2                  | 20                   | 85                     | 350                | 6                  | 4                 |
| 20 | Hamada et al.[36]       | B-SES      | yes            | yes           | 1                            | 7(?)               | 20                   | 20                     | 250                | 5                  | 2                 |
| 21 | Homma et al.[37]        | B-SES      | yes            | no            | 3                            | 3                  | 40                   | 20                     | 250                | 5                  | 2                 |
| 22 | Houdjijk et al.[38]     | WB-EMS     | yes            | yes           | 4                            | 2                  | 20                   | 85                     | 350                | 4                  | 4                 |
| 23 | Imaoka et al.[39]       | B-SES      | yes            | no            | 0.5                          | 5                  | 20                   | 20                     | 250                | 5                  | 2                 |
| 24 | Jee et al.[40]          | WB-EMS     | yes            | yes           | 1.5                          | 3                  | 20                   | 85                     | 350                | 6                  | 4                 |

|    |                            |        |     |      |      |      |    |                        |             |         |         |
|----|----------------------------|--------|-----|------|------|------|----|------------------------|-------------|---------|---------|
| 25 | Junger et al.[41]          | WB-EMS | yes | yes  | 1    | 2    | 20 | 85                     | 40          | 4       | 4       |
| 26 | Kataoka et al.[42]         | B-SES  | yes | No   | 3    | 3    | 20 | 4                      | 250         | 1200    |         |
| 27 | Kemmler et al.[44]         | WB-EMS | yes | Yes  | 3.5  | 2    | 20 | 7 and 85               | 350         | 4       | 4       |
| 28 | Kemmler et al.[43]         | WB-EMS | yes | Yes  | 3.5  | 1.50 | 30 | 85                     | 350         | 4       | 4       |
| 29 | Kemmler et al.[47]         | WB-EMS | yes | Yes  | 12   | 1.50 | 20 | 85                     | 350         | 6       | 4       |
| 30 | Kemmler et al.[45]         | WB-EMS | yes | Yes  | 4    | 1.50 | 20 | 85                     | 350         | 6       | 4       |
| 31 | Kemmler et al.[46]         | WB-EMS | yes | Yes  | 6    | 1    | 20 | 85                     | 350         | 4       | 4       |
| 32 | Kemmler et al.[11]         | WB-EMS | yes | Yes  | 4    | 1.50 | 20 | 85                     | 350         | 4       | 4       |
| 33 | Kim et al.[48]             | WB-EMS | no  | Yes  | 2    | 3    | 40 | 85                     | 350         | 6       | 4       |
| 34 | Kim et al.[49]             | WB-EMS | yes | Yes  | 3    | 3    | 20 | 85                     | 350         | 6       | 4       |
| 35 | Kiriscioglu et al.[50]     | WB-EMS | yes | Yes  | 2    | 2    | 25 | 85                     | 350         | 4       | 4       |
| 36 | Konrad et al.[51]          | WB-EMS | yes | Yes  | 1.5  | 1    | 20 | 85                     | 350         | 4       | 4       |
| 37 | Ludwig et al.[52]          | WB-EMS | yes | Yes  | 2.5  | 1.50 | 20 | 20 or 85               | 350         | 4       | 4       |
| 38 | Lukashevich et al.[53]     | WB-EMS | no  | Yes  | 0.66 | 4    | 20 | Up to 25000            | Up to 5000  | n.g.    | n.g.    |
| 39 | Matsumoto et al.[54]       | B-SES  | yes | no   | 1    | 5    | 20 | 20                     | 250         | 5       | 2       |
| 40 | Matsuo et al.[55]          | B-SES  | yes | n.g. | 0.5  | 5    | 20 | 20                     | 250         | 5       | 2       |
| 41 | Micke et al.[56]           | WB-EMS | yes | Yes  | 3    | 1    | 20 | 85                     | 350         | 6       | 4       |
| 42 | Miyamoto et al.[57]        | B-SES  | yes | n.g. | 1    | 4    | 30 | 4                      | 250         | 1200    |         |
| 43 | Mori et al.[58]            | B-SES  | yes | n.g. | 1.5  | 2    | 30 | 20                     | 250         | 5       | 2       |
| 44 | Müllerova et al.[59]       | WB-EMS | yes | yes  | 2.5  | 1    | 20 | 85                     | 350         | 4       | 4       |
| 45 | Nakamura et al.[60]        | B-SES  | yes | n.g. | 0.5  | 7    | 20 | 20                     | 250         | 5       | 2       |
| 46 | Nakamura et al.[61]        | B-SES  | yes | n.g. | 0.5  | 7    | 20 | 20                     | 250         | 5       | 2       |
| 47 | Nejad et al.[62]           | WB-EMS | no  | yes  | 3    | 3    | 20 | 15-33 and 35-75        | 200 and 400 | 6       | 4       |
| 48 | Noguchi et al.[63]         | B-SES  | yes | n.g. | 3    | 3    | 20 | 20                     | 250         | 5       | 2       |
| 49 | Nonoyama et al.[64]        | B-SES  | yes | n.g. | 1.30 | 5    | 30 | 20                     | 250         | 5       | 2       |
| 50 | Ochiai et al.[65]          | B-SES  | yes | n.g. | 1.10 | 7    | 20 | 20                     | 250         | 5       | 2       |
| 51 | Özdal et al.[67]           | WB-EMS | yes | no   | 2    | 3    | 25 | 80                     | 350         | 4       | 4       |
| 52 | Öktem et al. [66]          | WB-EMS | yes | yes  | 1.5  | 3    | 20 | 85                     | 250         | 6       | 2       |
| 53 | Pano-Rodriguez et al.[68]  | WB-EMS | no  | yes  | 2.5  | 2    | 40 | 7 and 55               | 150 to 350  | 6       | 4       |
| 54 | Park et al.[71]            | WB-EMS | no  | yes  | 1.5  | 3    | 40 | 80                     | n.g.        | 5       | 3       |
| 55 | Park et al.[70]            | WB-EMS | no  | yes  | 2    | 3    | 20 | 85                     | 350         | 6       | 4       |
| 56 | Park et al.[69]            | WB-EMS | yes | yes  | 1.5  | 3    | 20 | 80                     | n.g.        | 5       | 3       |
| 57 | Park et al. [72]           | WB-EMS | no  | yes  | 2    | 3    | 45 | 4                      | n.g.        | 2       | 2       |
| 58 | Qin et al.[73]             | WB-EMS | no  | yes  | 1.5  | 3    | 20 | 85                     | 350         | 6       | 4       |
| 59 | Reljic et al.[74]          | WB-EMS | yes | yes  | 3    | 2    | 20 | 85                     | 350         | 6       | 4       |
| 60 | Ricci et al.[75]           | WB-EMS | yes | yes  | 1.5  | 5    | 27 | 30 and 85              | 350         | 6       | 4       |
| 61 | Richter et al.[76]         | WB-EMS | Yes | Yes  | 3    | 2    | 20 | 85                     | 350         | 6       | 4       |
| 62 | Sadeghipour et al.[78]     | WB-EMS | yes | yes  | 1.5  | 2    | 20 | 85                     | 350         | 6       | 4       |
| 63 | Sadeghipour et al.[77]     | WB-EMS | yes | yes  | 2    | 2    | 20 | 7-15 and 85            | 350         | 4       | 4       |
| 64 | Sanchez-Infante et al.[79] | WB-EMS | no  | yes  | 2    | 1    | 20 | 10 and 85 <sup>2</sup> | 350         | 8/cont. | 4/cont. |
| 65 | Schink et al.[80]          | WB-EMS | yes | yes  | 3    | 2    | 20 | 85                     | 350         | 6       | 4       |
| 66 | Schink et al.[81]          | WB-EMS | yes | yes  | 3    | 2    | 20 | 85                     | 350         | 6       | 4       |
| 67 | Schwappacher et al.[82]    | WB-EMS | yes | yes  | 3    | 2    | 20 | 85                     | 350         | 6       | 4       |

|    |                            |        |     |      |      |      |    |     |      |      |    |
|----|----------------------------|--------|-----|------|------|------|----|-----|------|------|----|
| 68 | Schwappacher et al.[82]    | WB-EMS | yes | yes  | 3    | 2    | 20 | 85  | 350  | 6    | 4  |
| 69 | Schwappacher et al.[83]    | WB-EMS | yes | yes  | 3    | 2    | 20 | 85  | 350  | 6    | 4  |
| 70 | Silvestri et al.[84]       | WB-EMS | yes | yes  | 2    | 2    | 20 | 85  | 350  | 6    | 4  |
| 71 | Song et al.et al.[85]      | WB-EMS | no  | yes  | 1    | 3    | 20 | 60  | n.g. | 5    | 5  |
| 72 | Stephan et al.[86]         | WB-EMS | yes | no   | 1.5  | 1    | 20 | 85  | 350  | 4    | 4  |
| 73 | Struhar et al.[87]         | WB-EMS | yes | yes  | 2.5  | 1.50 | 22 | 100 | 350  | 4    | 15 |
| 74 | Suzuki et al.[88]          | B-SES  | yes | n.g. | 2    | 3    | 20 | 20  | 250  | 5    | 2  |
| 75 | Suzuki. et al.[89]         | B-SES  | yes | no   | 3    | 3    | 30 | 20  | 250  | 5    | 2  |
| 76 | Tanaka et al.[90]          | B-SES  | yes | no   | 0.30 | 5    | 35 | 20  | 250  | 5    | 2  |
| 77 | Teschler et al.[92]        | WB-EMS | yes | yes  | 2.5  |      | 20 | 85  | 350  | 6    | 4  |
| 78 | Teschler et al.[91]        | WB-EMS | yes | yes  | 1    | 1.50 | 20 | 85  | 350  | 4    | 4  |
| 79 | Tsurumi et al.[93]         | B-SES  | yes | no   | 3    | 3    | 30 | 4   | 250  | 1200 | 0  |
| 80 | Vacoulikova et al.[95]     | WB-EMS | yes | yes  | 2.5  | 1    | 20 | 85  | 350  | 4    | 4  |
| 81 | Vacoulikova et al.[94]     | WB-EMS | yes | yes  | 2.5  | 1    | 20 | 85  | 350  | 4    | 4  |
| 82 | van Buuren et al.[97]      | WB-EMS | yes | yes  | 2.5  | 2    | 20 | 80  | 350  | 4    | 4  |
| 83 | van Buuren 2015 et al.[96] | WB-EMS | yes | yes  | 2.5  | 2    | 20 | 80  | 350  | 4    | 4  |
| 84 | von Stengel et al.[98]     | WB-EMS | yes | yes  | 12   | 1.50 | 20 | 85  | 350  | 6    | 4  |
| 85 | Weissenfels et al.[99]     | WB-EMS | yes | yes  | 3    | 1    | 20 | 85  | 350  | 6    | 4  |
| 86 | Willert et al.[100]        | WB-EMS | no  | yes  | 4    | 1.50 | 20 | 85  | 350  | 6    | 4  |
| 87 | Zink et al.[101]           | WB-EMS | yes | yes  | 4    | 1    | 20 | 85  | 350  | 6    | 4  |

<sup>1</sup> This study (Teschler et al. 2016) intentionally applied a very intense WB-EMS protocol for novice applicants to determine the effects of WB-EMS on parameters related to rhabdomyolysis; <sup>2</sup> (Bellia et al. 2020) 15 min with intermittent impulse, 5 min with continuous impulse (15 Hz); <sup>3</sup> (Öktem et al.2022) 10 min with intermittent, 10 min with continuous impulse.
